# Supplementary material for: Vector Competence for Zika Virus Changes Depending on the Aedes aegypti’s Region of Origin in Manaus: A Study of an Endemic Brazilian Amazonian City
Source: MDPI journal article supplement (doi:10.3390/v15030770), 2023-03-17
Supplement: s1 [file s1]

Supplementary Material

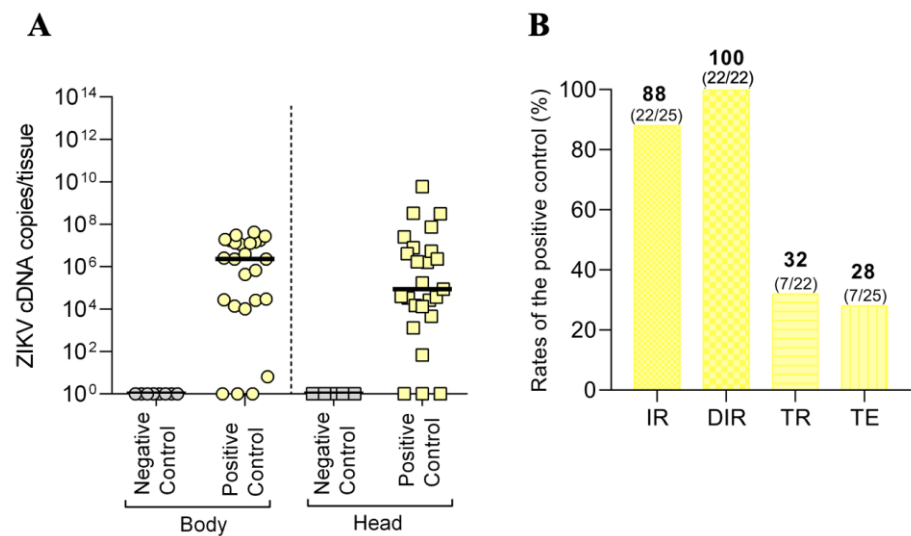

**Figure S1.** (A) Negative and positive controls for quantifying ZIKV viral loads (VLs) per body and head/salivary gland. The positive control was a well-established Brazilian colony of *Ae. aegypti* (strain PP-Campos) susceptible to the ZIKV strain SPH2015; the negative controls were the field-derived mosquitoes fed on uninfected blood. (B) Infection rate (IR), disseminated infection rate (DIR), transmission rate (TR), and transmission efficiency (TE) of the positive control strain of *Ae. aegypti*.
